# Supplementary material for: Efficient Molybdenum Hydrazonato Epoxidation Catalysts Operating under Green Chemistry Conditions: Water vs. Decane Competition
Source: MDPI journal article supplement (doi:10.3390/catal11070756), 2021-06-22
Supplement: s1 [file s1]

## Supplementary Materials (SM)

# Efficient Molybdenum Hydrazonato Epoxidation Catalysts Operating under Green Chemistry Conditions: Water vs. Decane Competition

Silvija Mrkonja, Edi Topić, Mirna Mandarić, Dominique Agustin and Jana Pisk

## Contents

|                                                                                                                                                                                                                                                                                                                                                                                                                                                                                                                                                                   |   |
|-------------------------------------------------------------------------------------------------------------------------------------------------------------------------------------------------------------------------------------------------------------------------------------------------------------------------------------------------------------------------------------------------------------------------------------------------------------------------------------------------------------------------------------------------------------------|---|
| <b>Figure S1.</b> Comparison of IR-ATR spectra of the complex $[\text{MoO}_2(\text{L}^{3\text{OMe}})(\text{MeOH})]$ (pink) and $[\text{MoO}_2(\text{L}^{3\text{OMe}})]_n$ (blue). .....                                                                                                                                                                                                                                                                                                                                                                           | 2 |
| <b>Figure S2.</b> Enumeration of atoms in the crystal structure of $[\text{MoO}_2(\text{L}^{3\text{OMe}})(\text{MeOH})]$ .....                                                                                                                                                                                                                                                                                                                                                                                                                                    | 3 |
| <b>Figure S3.</b> Enumeration of atoms in the crystal structure of $[\text{MoO}_2(\text{L}^{4\text{OMe}})(\text{MeOH})]\cdot 4,4\text{-bpy}$ . ....                                                                                                                                                                                                                                                                                                                                                                                                               | 3 |
| <b>Figure S4.</b> Crystal packing in the crystal structure of $[\text{MoO}_2(\text{L}^{3\text{OMe}})(\text{MeOH})]$ shown parallel to crystal $a$ -axis. ....                                                                                                                                                                                                                                                                                                                                                                                                     | 4 |
| <b>Figure S5.</b> Crystal packing in the crystal structure of $[\text{MoO}_2(\text{L}^{4\text{OMe}})(\text{MeOH})]\cdot 4,4\text{-bpy}$ shown parallel to crystal $b$ -axis. ....                                                                                                                                                                                                                                                                                                                                                                                 | 4 |
| <b>Figure S6.</b> Comparison of molecular structures of: a) and b) $[\text{MoO}_2(\text{L}^{3\text{OMe}})(\text{MeOH})]$ (blue) and $[\text{MoO}_2(\text{L}^{3\text{OMe}})(\text{H}_2\text{O})]$ (gray); c) $[\text{MoO}_2(\text{L}^{4\text{OMe}})(\text{MeOH})]\cdot 4,4\text{-bpy}$ (pink) and d) $[\text{MoO}_2(\text{L}^{4\text{OMe}})(\text{MeOH})]\cdot \text{MeOH}$ (gray). 4,4-bipyridine and methanol molecules are omitted for clarity. It can be seen that small variations in crystal composition have a significant effect on complex geometry. .... | 5 |
| <b>Table S1.</b> Geometrical parameters of the octahedral environment of molybdenum atom in the title complexes.....                                                                                                                                                                                                                                                                                                                                                                                                                                              | 5 |
| <b>Table S2.</b> Bond lengths (in Å) and angles (in °) for the prepared complexes. Atom enumeration is shown in Figures S1 and S2. ....                                                                                                                                                                                                                                                                                                                                                                                                                           | 6 |
| <b>Table S3.</b> Summary of general and crystallographic data for the prepared complexes.....                                                                                                                                                                                                                                                                                                                                                                                                                                                                     | 7 |
| <b>Table S4.</b> Simplified images of all the calculated Mo-containing species.....                                                                                                                                                                                                                                                                                                                                                                                                                                                                               | 8 |
| <b>Table S5.</b> Imaginary frequency ( $\text{cm}^{-1}$ ) of the calculated transition states shown in Table S1 .....                                                                                                                                                                                                                                                                                                                                                                                                                                             | 8 |
| <b>Table S6.</b> DFT Coordinates of all optimized species.....                                                                                                                                                                                                                                                                                                                                                                                                                                                                                                    | 8 |

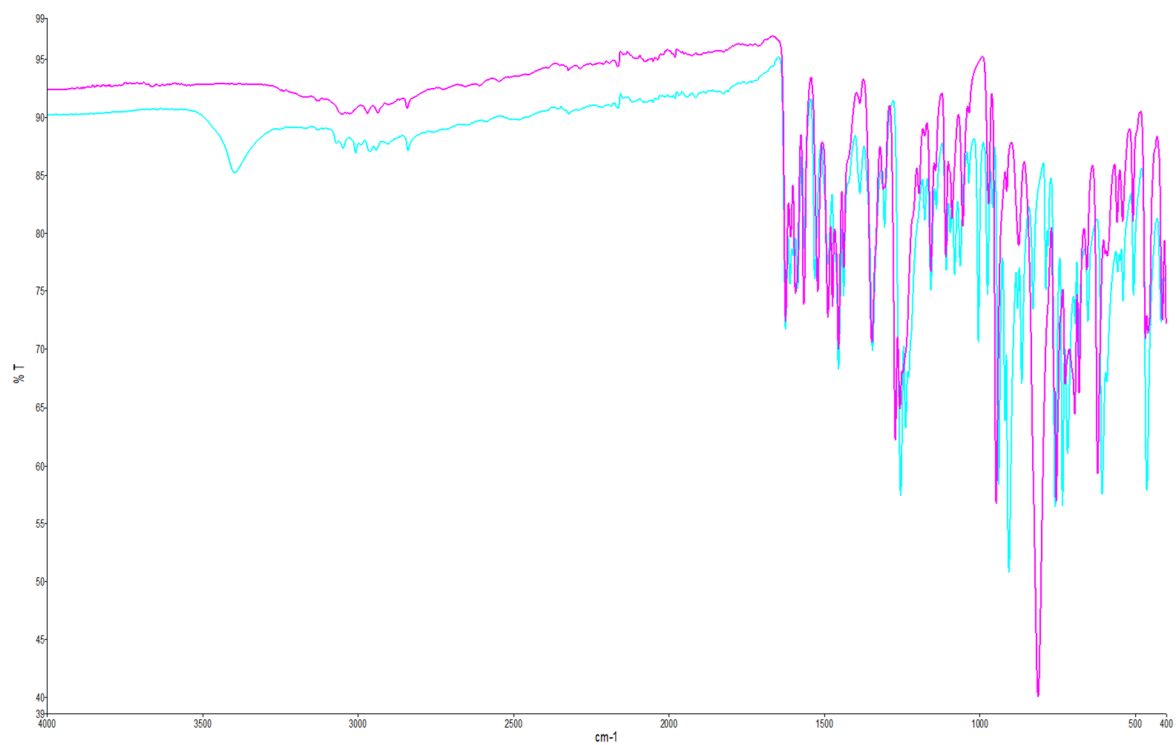

**Figure S1.** Comparison of IR-ATR spectra of the complex [MoO<sub>2</sub>(L<sup>3OMe</sup>)(MeOH)] (pink) and [MoO<sub>2</sub>(L<sup>3OMe</sup>)]<sub>n</sub> (blue).

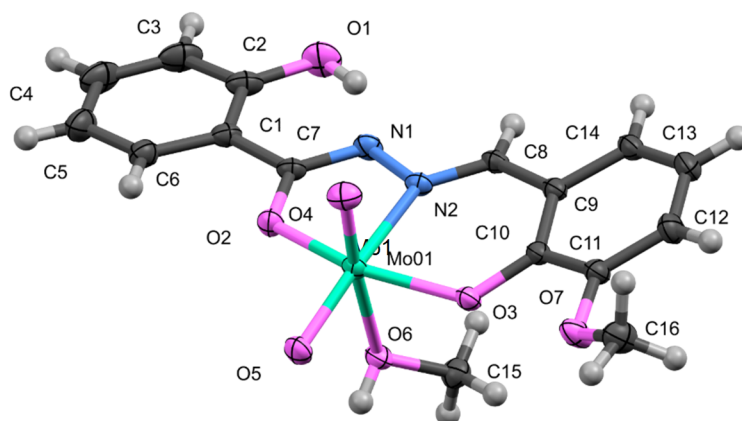

**Figure S2.** Enumeration of atoms in the crystal structure of  $[\text{MoO}_2(\text{L}^{3\text{OMe}})(\text{MeOH})]$ .

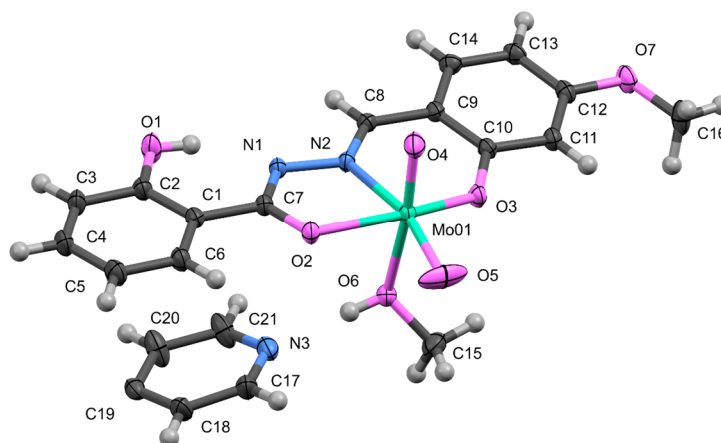

**Figure S3.** Enumeration of atoms in the crystal structure of  $[\text{MoO}_2(\text{L}^{4\text{OMe}})(\text{MeOH})] \cdot 4,4\text{-bpy}$ .

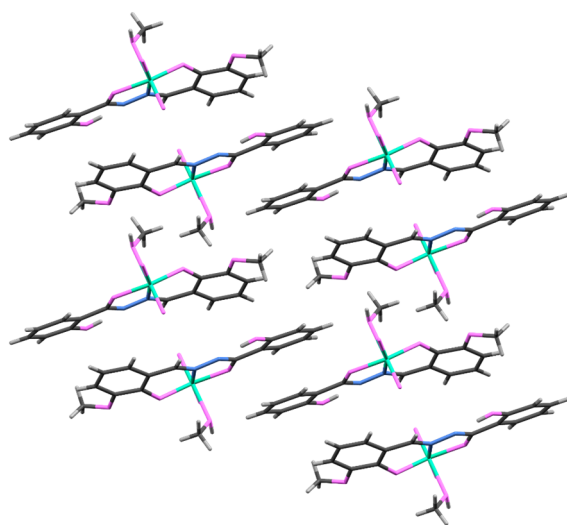

**Figure S4.** Crystal packing in the crystal structure of  $[\text{MoO}_2(\text{L}^{3\text{OMe}})(\text{MeOH})]$  shown parallel to crystal  $a$ -axis.

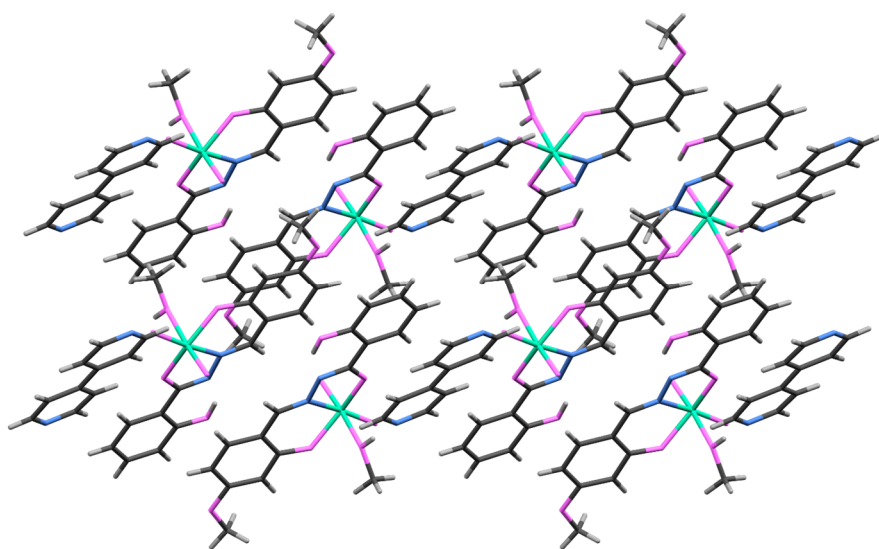

**Figure S5.** Crystal packing in the crystal structure of  $[\text{MoO}_2(\text{L}^{4\text{OMe}})(\text{MeOH})] \cdot 4,4\text{-bpy}$  shown parallel to crystal  $b$ -axis.

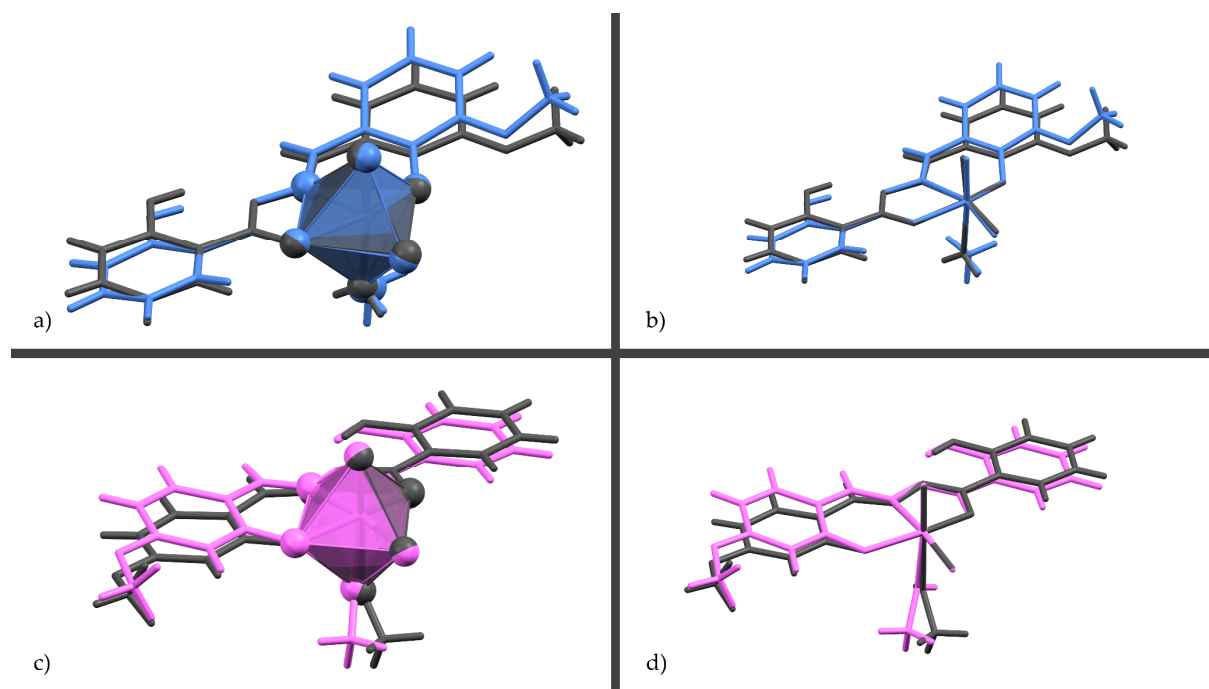

**Figure S6.** Comparison of molecular structures of: a) and b)  $[\text{MoO}_2(\text{L}^{3\text{OMe}})(\text{MeOH})]$  (blue) and  $[\text{MoO}_2(\text{L}^{3\text{OMe}})(\text{H}_2\text{O})]$  (gray); c)  $[\text{MoO}_2(\text{L}^{4\text{OMe}})(\text{MeOH})]\cdot 4,4\text{-byp}$  (pink) and d)  $[\text{MoO}_2(\text{L}^{4\text{OMe}})(\text{MeOH})]\cdot \text{MeOH}$  (gray). 4,4-bipyridine and methanol molecules are omitted for clarity. It can be seen that small variations in crystal composition have a significant effect on complex geometry.

**Table S1.** Geometrical parameters of the octahedral environment of molybdenum atom in the title complexes.

| Bond length/Å   | $[\text{MoO}_2(\text{L}^{\text{H}})(\text{MeOH})]$    | $[\text{MoO}_2(\text{L}^{3\text{OMe}})(\text{H}_2\text{O})]$              | $[\text{MoO}_2(\text{L}^{4\text{OMe}})(\text{MeOH})]\cdot \text{MeOH}$ |
|-----------------|-------------------------------------------------------|---------------------------------------------------------------------------|------------------------------------------------------------------------|
| Mo-hydrazone O  | 2.016                                                 | 2.017                                                                     | 1.921                                                                  |
| Mo-imine N      | 2.233                                                 | 2.247                                                                     | 2.211                                                                  |
| Mo-aryl O       | 1.927                                                 | 1.920                                                                     | 2.000                                                                  |
| Mo=O axial      | 1.705                                                 | 1.683                                                                     | 1.692                                                                  |
| Mo=O equatorial | 1.692                                                 | 1.688                                                                     | 1.713                                                                  |
| Mo-solvent O    | 2.349                                                 | 2.292                                                                     | 2.352                                                                  |
|                 | $[\text{MoO}_2(\text{L}^{3\text{OMe}})(\text{MeOH})]$ | $[\text{MoO}_2(\text{L}^{4\text{OMe}})(\text{MeOH})]\cdot 4,4\text{-byp}$ |                                                                        |
| Mo-hydrazone O  | 1.998                                                 | 2.018                                                                     |                                                                        |
| Mo-imine N      | 2.238                                                 | 2.216                                                                     |                                                                        |
| Mo-aryl O       | 1.939                                                 | 1.949                                                                     |                                                                        |
| Mo=O axial      | 1.685                                                 | 1.695                                                                     |                                                                        |
| Mo=O equatorial | 1.701                                                 | 1.732                                                                     |                                                                        |
| Mo-solvent O    | 2.368                                                 | 2.293                                                                     |                                                                        |

**Table S2.** Bond lengths (in Å) and angles (in °) for the prepared complexes. Atom enumeration is shown in Figures S1 and S2.

| Bond     | [MoO <sub>2</sub> (L <sup>3OMe</sup> )(MeOH)] | [MoO <sub>2</sub> (L <sup>4OMe</sup> )(MeOH)]<br>·4,4-byp | Angle        | [MoO <sub>2</sub> (L <sup>3OMe</sup> )(MeOH)] | [MoO <sub>2</sub> (L <sup>4OMe</sup> )(MeOH)]<br>·4,4-byp |
|----------|-----------------------------------------------|-----------------------------------------------------------|--------------|-----------------------------------------------|-----------------------------------------------------------|
| C1–C2    | 1.415(3)                                      | 1.405(5)                                                  | C2–C1–C7     | 121.4(2)                                      | 121.3(3)                                                  |
| C1–C6    | 1.394(3)                                      | 1.401(5)                                                  | C6–C1–C7     | 119.90(19)                                    | 119.6(3)                                                  |
| C2–C3    | 1.386(4)                                      | 1.399(5)                                                  | C6–C1–C2     | 118.7(2)                                      | 119.1(3)                                                  |
| C3–C4    | 1.371(5)                                      | 1.378(6)                                                  | O1–C2–C1     | 123.4(2)                                      | 123.1(3)                                                  |
| C5–C4    | 1.379(4)                                      | 1.389(6)                                                  | O1–C2–C3     | 118.0(2)                                      | 117.7(3)                                                  |
| C6–C5    | 1.369(3)                                      | 1.385(5)                                                  | C3–C2–C1     | 118.6(3)                                      | 119.3(3)                                                  |
| C7–C1    | 1.464(3)                                      | 1.468(4)                                                  | C4–C3–C2     | 121.1(3)                                      | 120.5(3)                                                  |
| C8–C9    | 1.439(3)                                      | 1.432(4)                                                  | C3–C4–C5     | 120.8(3)                                      | 120.8(3)                                                  |
| C9–C14   | 1.405(3)                                      | 1.409(4)                                                  | C6–C5–C4     | 119.2(3)                                      | 119.2(4)                                                  |
| C10–C9   | 1.403(3)                                      | 1.409(4)                                                  | C5–C6–C1     | 121.6(2)                                      | 121.1(3)                                                  |
| C10–C11  | 1.394(3)                                      | 1.399(4)                                                  | O2–C7–C1     | 118.20(19)                                    | 117.5(3)                                                  |
| C11–C12  | 1.389(3)                                      | 1.390(5)                                                  | N1–C7–O2     | 122.14(19)                                    | 122.6(3)                                                  |
| C12–C13  | 1.387(3)                                      | 1.400(5)                                                  | N1–C7–C1     | 119.66(18)                                    | 119.9(3)                                                  |
| C13–C14  | 1.364(3)                                      | 1.369(5)                                                  | N2–C8–C9     | 123.31(18)                                    | 124.4(3)                                                  |
| C18–C17  |                                               | 1.386(6)                                                  | C10–C9–C8    | 122.70(18)                                    | 122.9(3)                                                  |
| C19–C19' |                                               | 1.489(7)                                                  | C10–C9–C14   | 119.8(2)                                      | 118.7(3)                                                  |
| C19–C18  |                                               | 1.389(6)                                                  | C14–C9–C8    | 117.48(18)                                    | 118.3(3)                                                  |
| C19–C20  |                                               | 1.387(6)                                                  | O3–C10–C9    | 122.82(19)                                    | 123.1(3)                                                  |
| C21–C20  |                                               | 1.385(6)                                                  | O3–C10–C11   | 118.12(18)                                    | 116.6(3)                                                  |
| Mo1–O2   | 1.9978(15)                                    | 2.019(2)                                                  | C11–C10–C9   | 119.05(18)                                    | 120.3(3)                                                  |
| Mo1–O3   | 1.9392(15)                                    | 1.949(2)                                                  | C12–C11–C10  | 120.0(2)                                      | 119.2(3)                                                  |
| Mo1–O6   | 2.3680(16)                                    | 2.293(2)                                                  | O7–C12–C11   |                                               | 124.1(3)                                                  |
| Mo1–O4   | 1.6855(16)                                    | 1.695(3)                                                  | O7–C12–C13   |                                               | 114.6(3)                                                  |
| Mo1–N2   | 2.2385(16)                                    | 2.216(2)                                                  | C11–C12–C13  |                                               | 121.3(3)                                                  |
| Mo1–O5   | 1.7012(14)                                    | 1.732(3)                                                  | C11–O7–C16   | 117.73(18)                                    |                                                           |
| N1–C7    | 1.304(3)                                      | 1.298(4)                                                  | O7–C11–C10   | 116.03(18)                                    |                                                           |
| N2–N1    | 1.384(2)                                      | 1.396(3)                                                  | O7–C11–C12   | 123.9(2)                                      |                                                           |
| N2–C8    | 1.287(3)                                      | 1.293(4)                                                  | C14–C13–C12  | 120.1(2)                                      | 119.2(3)                                                  |
| N3–C21   |                                               | 1.323(6)                                                  | C13–C14–C9   | 120.4(2)                                      | 121.4(3)                                                  |
| N3–C17   |                                               | 1.328(6)                                                  | N3–C17–C18   |                                               | 123.5(4)                                                  |
| O1–C2    | 1.345(3)                                      | 1.346(4)                                                  | C17–C18–C19  |                                               | 119.3(4)                                                  |
| O2–C7    | 1.317(2)                                      | 1.325(4)                                                  | C18–C19–C19' |                                               | 121.5(4)                                                  |
| O3–C10   | 1.349(2)                                      | 1.341(4)                                                  | C20–C19–C19' |                                               | 121.4(5)                                                  |
| O6–C15   | 1.429(3)                                      | 1.423(4)                                                  | C20–C19–C18  |                                               | 117.1(3)                                                  |
| O7–C12   |                                               | 1.354(4)                                                  | C21–C20–C19  |                                               | 119.2(4)                                                  |
| O7–C11   | 1.371(3)                                      |                                                           | N3–C21–C20   |                                               | 123.8(4)                                                  |
| O7–C16   | 1.412(3)                                      | 1.428(5)                                                  | O2–Mo1–O6    | 80.68(6)                                      | 79.46(9)                                                  |
|          |                                               |                                                           | O2–Mo1–N2    | 71.52(6)                                      | 72.14(9)                                                  |
|          |                                               |                                                           | O3–Mo1–O2    | 149.56(6)                                     | 149.79(10)                                                |
|          |                                               |                                                           | O3–Mo1–O6    | 80.57(6)                                      | 79.94(10)                                                 |
|          |                                               |                                                           | O3–Mo1–N2    | 81.14(6)                                      | 82.01(9)                                                  |
|          |                                               |                                                           | O4–Mo1–O2    | 98.39(7)                                      | 97.71(11)                                                 |
|          |                                               |                                                           | O4–Mo1–O3    | 97.62(7)                                      | 98.89(12)                                                 |
|          |                                               |                                                           | O4–Mo1–O6    | 173.66(7)                                     | 170.28(11)                                                |
|          |                                               |                                                           | O4–Mo1–N2    | 96.26(7)                                      | 92.71(12)                                                 |
|          |                                               |                                                           | O4–Mo1–O5    | 105.53(8)                                     | 105.39(15)                                                |
|          |                                               |                                                           | N2–Mo1–O6    | 77.48(6)                                      | 77.57(9)                                                  |
|          |                                               |                                                           | O5–Mo1–O2    | 96.20(7)                                      | 98.9(2)                                                   |
|          |                                               |                                                           | O5–Mo1–O3    | 104.20(7)                                     | 100.7(2)                                                  |
|          |                                               |                                                           | O5–Mo1–O6    | 80.80(7)                                      | 84.27(13)                                                 |
|          |                                               |                                                           | O5–Mo1–N2    | 156.46(7)                                     | 160.90(14)                                                |
|          |                                               |                                                           | C7–N1–N2     | 109.87(16)                                    | 110.1(3)                                                  |
|          |                                               |                                                           | N1–N2–Mo1    | 115.51(12)                                    | 115.72(18)                                                |
|          |                                               |                                                           | C8–N2–Mo1    | 128.16(14)                                    | 127.7(2)                                                  |
|          |                                               |                                                           | C8–N2–N1     | 116.08(16)                                    | 116.4(3)                                                  |
|          |                                               |                                                           | C21–N3–C17   |                                               | 117.1(3)                                                  |
|          |                                               |                                                           | C7–O2–Mo1    | 120.84(13)                                    | 119.40(19)                                                |
|          |                                               |                                                           | C10–O3–Mo1   | 131.10(13)                                    | 133.9(2)                                                  |
|          |                                               |                                                           | C15–O6–Mo1   | 127.28(14)                                    | 122.7(2)                                                  |
|          |                                               |                                                           | C12–O7–C16   |                                               | 118.2(3)                                                  |

**Table S3.** Summary of general and crystallographic data for the prepared complexes.

| Identification code                                          | [MoO <sub>2</sub> (L <sup>3OMe</sup> )(MeOH)]                                | [MoO <sub>2</sub> (L <sup>4OMe</sup> )(MeOH)]·4,4-byp                        |
|--------------------------------------------------------------|------------------------------------------------------------------------------|------------------------------------------------------------------------------|
| Empirical formula                                            | C <sub>16</sub> H <sub>16</sub> MoN <sub>2</sub> O <sub>7</sub>              | C <sub>21</sub> H <sub>20</sub> MoN <sub>3</sub> O <sub>7</sub>              |
| Formula weight                                               | 444.25                                                                       | 522.34                                                                       |
| Temperature/K                                                | 293(2)                                                                       | 170.15                                                                       |
| Crystal system                                               | triclinic                                                                    | triclinic                                                                    |
| Space group                                                  | <i>P</i> -1                                                                  | <i>P</i> -1                                                                  |
| <i>a</i> /Å                                                  | 6.8456(3)                                                                    | 8.0480(3)                                                                    |
| <i>b</i> /Å                                                  | 10.7610(4)                                                                   | 9.8129(4)                                                                    |
| <i>c</i> /Å                                                  | 12.7677(6)                                                                   | 14.0421(5)                                                                   |
| $\alpha$ /°                                                  | 102.702(4)                                                                   | 90.980(3)                                                                    |
| $\beta$ /°                                                   | 102.098(4)                                                                   | 94.142(3)                                                                    |
| $\gamma$ /°                                                  | 107.076(4)                                                                   | 104.614(3)                                                                   |
| Volume/Å <sup>3</sup>                                        | 838.31(7)                                                                    | 1069.57(7)                                                                   |
| <i>Z</i>                                                     | 2                                                                            | 2                                                                            |
| $\rho_{\text{calc}}$ /cm <sup>3</sup>                        | 1.76                                                                         | 1.622                                                                        |
| $\mu$ /mm <sup>-1</sup>                                      | 0.826                                                                        | 5.45                                                                         |
| <i>F</i> (000)                                               | 448                                                                          | 530                                                                          |
| Crystal size/mm <sup>3</sup>                                 | 0.5 × 0.1 × 0.1                                                              | 0.86 × 0.47 × 0.05                                                           |
| Radiation                                                    | MoK $\alpha$ ( $\lambda$ = 0.71073)                                          | CuK $\alpha$ ( $\lambda$ = 1.54184)                                          |
| 2 $\theta$ range for data collection/°                       | 8.542 to 65.674                                                              | 6.316 to 160.6                                                               |
| Index ranges                                                 | -10 ≤ <i>h</i> ≤ 10, -15 ≤ <i>k</i> ≤ 16, -18 ≤ <i>l</i> ≤ 18                | -10 ≤ <i>h</i> ≤ 9, -12 ≤ <i>k</i> ≤ 12, -17 ≤ <i>l</i> ≤ 17                 |
| Reflections collected                                        | 19202                                                                        | 14113                                                                        |
| Independent reflections                                      | 5680 [ <i>R</i> <sub>int</sub> = 0.0373, <i>R</i> <sub>sigma</sub> = 0.0411] | 4543 [ <i>R</i> <sub>int</sub> = 0.0326, <i>R</i> <sub>sigma</sub> = 0.0295] |
| Data/restraints/parameters                                   | 5680/2/245                                                                   | 4543/2/297                                                                   |
| Goodness-of-fit on <i>F</i> <sup>2</sup>                     | 1.087                                                                        | 1.094                                                                        |
| Final <i>R</i> indexes [ <i>I</i> ≥ 2 $\sigma$ ( <i>I</i> )] | <i>R</i> <sub>1</sub> = 0.0342, <i>wR</i> <sub>2</sub> = 0.0691              | <i>R</i> <sub>1</sub> = 0.0399, <i>wR</i> <sub>2</sub> = 0.1102              |
| Final <i>R</i> indexes [all data]                            | <i>R</i> <sub>1</sub> = 0.0499, <i>wR</i> <sub>2</sub> = 0.0769              | <i>R</i> <sub>1</sub> = 0.0407, <i>wR</i> <sub>2</sub> = 0.1107              |
| Largest diff. peak/hole / e Å <sup>-3</sup>                  | 1.34/-0.50                                                                   | 1.73/-1.00                                                                   |

**Table S4.** Simplified images of all the calculated Mo-containing species.

The non-relevant H on the ligand an tBu group have been omitted for clarity.

|                              | L <sup>H</sup>                                                                      | L <sup>3OMe</sup>                                                                   | L <sup>4OMe</sup>                                                                     |
|------------------------------|-------------------------------------------------------------------------------------|-------------------------------------------------------------------------------------|---------------------------------------------------------------------------------------|
| TBHP as oxidant              |                                                                                     |                                                                                     |                                                                                       |
| Gas phase                    |                                                                                     |                                                                                     |                                                                                       |
| [MoO <sub>2</sub> (L)(MeOH)] | 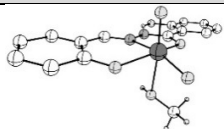   |    |    |
| [MoO <sub>2</sub> (L)]       |    |    |    |
| [MoO <sub>2</sub> (L)(TBHP)] |    |    |    |
| TS                           |   |   |   |
| [MoO(OH)(L)(OtBu)]           |  |  |  |

**Table S5.** Imaginary frequency (cm<sup>-1</sup>) of the calculated transition states shown in Table S1

|    | L <sup>H</sup> | L <sup>3OMe</sup> | L <sup>4OMe</sup> |
|----|----------------|-------------------|-------------------|
| TS | 469i           | 471i              | 471i              |

**Table S6.** DFT Coordinates of all optimized species

A - Organic molecules

| C <sub>2</sub> H <sub>4</sub>   |              |              |             |      |              |              |              |
|---------------------------------|--------------|--------------|-------------|------|--------------|--------------|--------------|
| 6                               | 0.000000000  | 0.665616000  | 0.000000000 | 6    | 0.663277000  | -0.487998000 | 0.000000000  |
| 1                               | 0.923789000  | 1.239603000  | 0.000000000 | 1    | -0.044284000 | 1.406100000  | 0.920513000  |
| 1                               | -0.923751000 | 1.239647000  | 0.000000000 | 1    | 1.105429000  | -0.869573000 | 0.920803000  |
| 6                               | 0.000000000  | -0.665616000 | 0.000000000 | 8    | -0.762744000 | -0.385408000 | 0.000000000  |
| 1                               | -0.923789000 | -1.239603000 | 0.000000000 | 1    | -0.044284000 | 1.406100000  | -0.920513000 |
| 1                               | 0.923751000  | -1.239647000 | 0.000000000 | 1    | 1.105429000  | -0.869573000 | -0.920803000 |
| C <sub>2</sub> H <sub>4</sub> O |              |              |             | TBHP |              |              |              |
| 6                               | 0.000000000  | 0.823033000  | 0.000000000 | 6    | 0.386063000  | 0.000211000  | 0.035516000  |
|                                 |              |              |             | 8    | -0.724877000 | -0.051131000 | -0.892876000 |
|                                 |              |              |             | 8    | -1.972121000 | 0.107335000  | -0.155683000 |
|                                 |              |              |             | 6    | 1.585594000  | -0.148364000 | -0.908710000 |



|   |              |              |              |
|---|--------------|--------------|--------------|
| 6 | 0.308477000  | -1.169459000 | 1.023961000  |
| 6 | 0.408392000  | 1.352799000  | 0.755437000  |
| 1 | -2.332288000 | -0.792908000 | -0.245178000 |
| 1 | 1.280879000  | 1.423828000  | 1.414956000  |
| 1 | 1.184972000  | -1.179544000 | 1.681110000  |
| 1 | 2.518340000  | -0.109351000 | -0.336278000 |
| 1 | -0.583795000 | -1.085739000 | 1.651566000  |
| 1 | 0.273436000  | -2.124477000 | 0.486863000  |
| 1 | 1.545636000  | -1.103632000 | -1.442442000 |
| 1 | 1.596327000  | 0.660559000  | -1.645981000 |
| 1 | 0.455220000  | 2.169404000  | 0.027401000  |

#### *tBuOH*

|   |              |              |              |
|---|--------------|--------------|--------------|
| 6 | -0.005589000 | -0.000026000 | 0.014420000  |
| 8 | 0.015118000  | -0.000431000 | 1.451985000  |
| 1 | 0.945639000  | 0.001902000  | 1.728630000  |
| 6 | -1.490947000 | -0.005338000 | -0.356041000 |
| 6 | 0.694937000  | -1.262772000 | -0.510972000 |
| 6 | 0.685524000  | 1.268259000  | -0.510112000 |
| 1 | 0.646742000  | 1.325318000  | -1.604317000 |
| 1 | 0.656167000  | -1.319650000 | -1.605180000 |
| 1 | -1.623187000 | -0.004815000 | -1.443350000 |
| 1 | 1.752964000  | -1.271531000 | -0.216357000 |

|   |              |              |              |
|---|--------------|--------------|--------------|
| 1 | 0.219546000  | -2.158915000 | -0.098630000 |
| 1 | -1.981082000 | -0.894002000 | 0.055230000  |
| 1 | -1.987701000 | 0.878867000  | 0.056897000  |
| 1 | 0.203120000  | 2.160551000  | -0.097564000 |
| 1 | 1.743307000  | 1.284985000  | -0.215007000 |

#### *MeOH*

|   |              |              |              |
|---|--------------|--------------|--------------|
| 8 | -0.748606000 | -0.122482000 | 0.000001000  |
| 6 | 0.661940000  | 0.019648000  | 0.000035000  |
| 1 | 1.036807000  | 0.543842000  | 0.893075000  |
| 1 | 1.036822000  | 0.543722000  | -0.893232000 |
| 1 | 1.079608000  | -0.990888000 | -0.000013000 |
| 1 | -1.136031000 | 0.765290000  | -0.000051000 |

# B1 - With Ligand L<sup>H</sup>

## MoO<sub>2</sub>(L<sup>H</sup>)(MeOH)

|    |              |              |              |
|----|--------------|--------------|--------------|
| 6  | -0.395539000 | -2.252625000 | 2.632740000  |
| 1  | -1.454536000 | -2.140510000 | 2.376096000  |
| 1  | -0.257951000 | -2.183615000 | 3.717179000  |
| 1  | -0.037342000 | -3.215677000 | 2.272591000  |
| 1  | -2.084603000 | 2.588829000  | 0.291398000  |
| 1  | 0.120217000  | -0.376413000 | 2.257296000  |
| 42 | 0.713423000  | -1.333027000 | -0.508264000 |
| 7  | -0.933001000 | 1.268524000  | 0.089882000  |
| 8  | -1.276627000 | -0.971094000 | -0.319007000 |
| 8  | 0.652495000  | -3.005449000 | -0.197298000 |
| 8  | 0.406699000  | -1.257719000 | 1.970510000  |
| 7  | 0.386967000  | 0.878399000  | 0.012313000  |
| 6  | -3.766694000 | 1.725267000  | 0.099066000  |
| 6  | -1.739431000 | 0.245374000  | -0.125911000 |
| 6  | 4.662532000  | 0.103721000  | 0.012781000  |
| 1  | 5.064039000  | -0.903789000 | -0.016941000 |
| 6  | 3.267399000  | 0.257983000  | 0.034326000  |
| 6  | 4.958039000  | 2.513795000  | 0.081650000  |
| 1  | 5.613098000  | 3.379011000  | 0.097378000  |
| 6  | 1.291654000  | 1.804838000  | 0.121097000  |
| 1  | 0.948060000  | 2.833737000  | 0.243418000  |
| 8  | 0.844747000  | -1.127600000 | -2.184927000 |
| 8  | 2.512618000  | -0.844444000 | 0.055488000  |
| 6  | -5.164702000 | 1.856462000  | 0.089351000  |
| 1  | -5.583005000 | 2.842246000  | 0.265331000  |
| 6  | -3.188667000 | 0.445623000  | -0.128410000 |
| 6  | -4.036374000 | -0.656951000 | -0.362947000 |
| 1  | -3.578257000 | -1.623673000 | -0.541677000 |
| 6  | 2.710771000  | 1.565959000  | 0.079987000  |
| 6  | 5.493579000  | 1.217566000  | 0.032251000  |
| 6  | 3.582754000  | 2.677032000  | 0.109467000  |
| 1  | 3.151366000  | 3.674494000  | 0.147688000  |
| 6  | -5.414417000 | -0.513160000 | -0.371467000 |
| 1  | -6.052446000 | -1.371683000 | -0.556148000 |
| 6  | -5.974313000 | 0.753299000  | -0.142185000 |
| 1  | -7.054125000 | 0.877251000  | -0.147014000 |
| 1  | 6.570916000  | 1.077832000  | 0.011659000  |
| 8  | -3.043242000 | 2.835746000  | 0.330570000  |

## MoO<sub>2</sub>(L<sup>H</sup>)

|    |              |              |              |
|----|--------------|--------------|--------------|
| 42 | -0.699122000 | -1.512301000 | 0.075624000  |
| 8  | 1.250418000  | -1.116757000 | -0.172756000 |
| 8  | -0.651250000 | -2.942585000 | -0.835295000 |
| 7  | 0.924962000  | 1.146894000  | -0.053115000 |
| 6  | 3.769206000  | 1.584277000  | -0.001089000 |
| 7  | -0.388752000 | 0.734988000  | -0.046214000 |
| 6  | 1.735295000  | 0.111298000  | -0.091703000 |
| 8  | -2.478789000 | -0.918227000 | -0.439945000 |
| 6  | 5.167969000  | 1.700025000  | 0.022359000  |
| 1  | 5.594048000  | 2.696483000  | 0.077984000  |
| 6  | -3.257153000 | 0.149494000  | -0.231413000 |
| 8  | -0.820982000 | -1.871395000 | 1.727261000  |

|   |              |              |              |
|---|--------------|--------------|--------------|
| 6 | 3.182033000  | 0.290341000  | -0.072552000 |
| 6 | -3.587633000 | 2.540699000  | 0.123639000  |
| 1 | -3.163373000 | 3.530795000  | 0.270921000  |
| 6 | -4.960600000 | 2.364591000  | 0.096541000  |
| 1 | -5.624193000 | 3.213839000  | 0.223506000  |
| 6 | -1.294606000 | 1.672037000  | -0.013822000 |
| 1 | -0.938556000 | 2.701750000  | 0.034192000  |
| 6 | 4.020788000  | -0.843296000 | -0.121477000 |
| 1 | 3.556537000  | -1.821826000 | -0.177187000 |
| 6 | -4.648983000 | -0.019705000 | -0.264527000 |
| 1 | -5.042677000 | -1.017633000 | -0.426019000 |
| 6 | -2.710202000 | 1.443468000  | -0.030870000 |
| 6 | 5.399339000  | -0.713811000 | -0.098038000 |
| 1 | 6.031546000  | -1.595218000 | -0.135206000 |
| 6 | 5.968508000  | 0.567578000  | -0.025241000 |
| 1 | 7.049401000  | 0.679409000  | -0.006081000 |
| 6 | -5.486620000 | 1.076879000  | -0.098076000 |
| 1 | -6.563020000 | 0.931906000  | -0.123276000 |
| 8 | 3.054487000  | 2.722998000  | 0.045568000  |
| 1 | 2.094807000  | 2.488423000  | 0.019211000  |

## MoO<sub>2</sub>(L<sup>H</sup>)(TBHP)

|    |              |              |              |
|----|--------------|--------------|--------------|
| 42 | -0.545548000 | 0.088465000  | -1.542207000 |
| 8  | 1.401598000  | 0.078615000  | -1.109905000 |
| 8  | -0.549483000 | 1.630458000  | -2.290094000 |
| 7  | 1.117670000  | -1.345728000 | 0.663991000  |
| 6  | 3.962735000  | -1.466678000 | 1.060313000  |
| 7  | -0.196757000 | -1.196702000 | 0.294117000  |
| 6  | 1.905778000  | -0.655499000 | -0.133476000 |
| 8  | -2.333843000 | 0.059569000  | -0.784941000 |
| 6  | 5.361162000  | -1.460588000 | 1.182364000  |
| 1  | 5.805164000  | -2.068593000 | 1.963885000  |
| 6  | -3.080062000 | -0.851663000 | -0.142165000 |
| 8  | -0.644630000 | -1.097323000 | -2.742576000 |
| 6  | 3.352336000  | -0.680275000 | 0.043699000  |
| 6  | -3.352079000 | -2.695871000 | 1.427987000  |
| 1  | -2.906424000 | -3.421426000 | 2.103954000  |
| 6  | -4.725719000 | -2.658803000 | 1.249313000  |
| 1  | -5.365575000 | -3.355133000 | 1.781783000  |
| 6  | -1.083839000 | -1.871072000 | 0.965191000  |
| 1  | -0.718148000 | -2.531778000 | 1.752065000  |
| 6  | 4.168013000  | 0.089788000  | -0.811950000 |
| 1  | 3.685275000  | 0.688596000  | -1.576229000 |
| 6  | -4.471018000 | -0.813686000 | -0.310906000 |
| 1  | -4.887902000 | -0.070484000 | -0.982496000 |
| 6  | -2.502184000 | -1.806194000 | 0.734756000  |
| 6  | 5.546505000  | 0.086756000  | -0.679219000 |
| 1  | 6.160742000  | 0.685158000  | -1.344511000 |
| 6  | 6.138927000  | -0.695556000 | 0.324737000  |
| 1  | 7.219992000  | -0.704431000 | 0.436827000  |
| 6  | -5.281190000 | -1.712183000 | 0.374984000  |
| 1  | -6.357365000 | -1.674794000 | 0.231071000  |
| 1  | 2.307536000  | -2.125590000 | 1.727100000  |
| 6  | -0.911674000 | 2.845569000  | 1.508109000  |

|   |              |              |              |
|---|--------------|--------------|--------------|
| 8 | -0.061583000 | 2.131156000  | 0.558952000  |
| 8 | 0.622518000  | 3.108639000  | -0.277052000 |
| 6 | -1.458319000 | 1.721663000  | 2.393443000  |
| 6 | -2.034174000 | 3.572158000  | 0.761590000  |
| 6 | -0.049020000 | 3.810526000  | 2.328449000  |
| 1 | 0.211824000  | 2.888131000  | -1.142997000 |
| 1 | -0.660232000 | 4.302768000  | 3.093331000  |
| 1 | -2.693628000 | 4.086245000  | 1.469967000  |
| 1 | -2.077263000 | 2.151147000  | 3.188365000  |
| 1 | -1.619420000 | 4.319121000  | 0.079231000  |
| 1 | -2.633878000 | 2.861907000  | 0.182500000  |
| 1 | -2.077148000 | 1.028422000  | 1.817574000  |
| 1 | -0.638290000 | 1.164574000  | 2.858420000  |
| 1 | 0.761561000  | 3.268521000  | 2.826762000  |
| 1 | 0.390808000  | 4.577310000  | 1.687081000  |
| 8 | 3.270663000  | -2.228433000 | 1.926733000  |

TS

|    |              |              |              |
|----|--------------|--------------|--------------|
| 42 | 0.346056000  | 0.546289000  | 1.229159000  |
| 8  | -1.604977000 | 0.363144000  | 0.732386000  |
| 8  | 0.188039000  | 2.020588000  | 2.125012000  |
| 7  | -1.132034000 | -1.186425000 | -0.903143000 |
| 6  | -3.910419000 | -1.363071000 | -1.580342000 |
| 7  | 0.146219000  | -0.984956000 | -0.445361000 |
| 6  | -1.992282000 | -0.452219000 | -0.224775000 |
| 8  | 2.207483000  | 0.440037000  | 0.667646000  |
| 6  | -5.291142000 | -1.398999000 | -1.836130000 |
| 1  | -5.640540000 | -2.035078000 | -2.643058000 |
| 6  | 2.979845000  | -0.581789000 | 0.268150000  |
| 8  | 0.416070000  | -0.684235000 | 2.388807000  |
| 6  | -3.420778000 | -0.536489000 | -0.531438000 |
| 6  | 3.366441000  | -2.656340000 | -0.950400000 |
| 1  | 2.975835000  | -3.474208000 | -1.551127000 |
| 6  | 4.713074000  | -2.615099000 | -0.622611000 |
| 1  | 5.383215000  | -3.398424000 | -0.962366000 |
| 6  | 1.084063000  | -1.756151000 | -0.898243000 |
| 1  | 0.803303000  | -2.535235000 | -1.608848000 |
| 6  | -4.337671000 | 0.217921000  | 0.227749000  |
| 1  | -3.946616000 | 0.835375000  | 1.029010000  |
| 6  | 4.345183000  | -0.543178000 | 0.586769000  |
| 1  | 4.709102000  | 0.291590000  | 1.176849000  |
| 6  | 2.471755000  | -1.657304000 | -0.511044000 |
| 6  | -5.698291000 | 0.170233000  | -0.031374000 |
| 1  | -6.390672000 | 0.754862000  | 0.566551000  |
| 6  | -6.170068000 | -0.644052000 | -1.072548000 |
| 1  | -7.234967000 | -0.688865000 | -1.285913000 |
| 6  | 5.198412000  | -1.551254000 | 0.150866000  |
| 1  | 6.251991000  | -1.507607000 | 0.412898000  |
| 1  | -2.183208000 | -2.000017000 | -2.049177000 |
| 6  | 0.879292000  | 2.576224000  | -1.717601000 |
| 8  | 0.142026000  | 2.042282000  | -0.617178000 |
| 8  | -0.734189000 | 3.526757000  | 0.170004000  |
| 6  | 1.451158000  | 1.387514000  | -2.517435000 |
| 6  | 2.018849000  | 3.476101000  | -1.213706000 |
| 6  | -0.080566000 | 3.358147000  | -2.632398000 |
| 1  | -0.347804000 | 3.137474000  | 1.003887000  |

|   |              |              |              |
|---|--------------|--------------|--------------|
| 1 | 0.438779000  | 3.695420000  | -3.537177000 |
| 1 | 2.600205000  | 3.881813000  | -2.050504000 |
| 1 | 1.964899000  | 1.762990000  | -3.410269000 |
| 1 | 1.611025000  | 4.313784000  | -0.639646000 |
| 1 | 2.693240000  | 2.907270000  | -0.565580000 |
| 1 | 2.171697000  | 0.818732000  | -1.927157000 |
| 1 | 0.646157000  | 0.719469000  | -2.839186000 |
| 1 | -0.919004000 | 2.719943000  | -2.931062000 |
| 1 | -0.479401000 | 4.234893000  | -2.116265000 |
| 6 | -2.221443000 | 4.307529000  | 0.910435000  |
| 1 | -2.815156000 | 4.437022000  | 0.012495000  |
| 1 | -2.572484000 | 3.551852000  | 1.605703000  |
| 6 | -1.325286000 | 5.276018000  | 1.310595000  |
| 1 | -0.822174000 | 5.214313000  | 2.270361000  |
| 1 | -1.065056000 | 6.103180000  | 0.659920000  |
| 8 | -3.118160000 | -2.122113000 | -2.357414000 |

MoO(OR)(OH)(L<sup>H</sup>)

|    |              |              |              |
|----|--------------|--------------|--------------|
| 42 | -0.566502000 | 0.674285000  | -1.071543000 |
| 8  | 1.415670000  | 0.439959000  | -0.944399000 |
| 8  | -0.439004000 | 2.190475000  | -2.221206000 |
| 7  | 1.199947000  | -1.327646000 | 0.495956000  |
| 6  | 4.058252000  | -1.522470000 | 0.733992000  |
| 7  | -0.129132000 | -1.110056000 | 0.217432000  |
| 6  | 1.955979000  | -0.482852000 | -0.171315000 |
| 8  | -2.370146000 | 0.326018000  | -0.354051000 |
| 6  | 5.461045000  | -1.544132000 | 0.788321000  |
| 1  | 5.933031000  | -2.293952000 | 1.414968000  |
| 6  | -3.041558000 | -0.807556000 | -0.148395000 |
| 8  | -0.924414000 | -0.385490000 | -2.348711000 |
| 6  | 3.411653000  | -0.550448000 | -0.078293000 |
| 6  | -3.176914000 | -3.101530000 | 0.674790000  |
| 1  | -2.679408000 | -3.981113000 | 1.076217000  |
| 6  | -4.545092000 | -3.112833000 | 0.457686000  |
| 1  | -5.129157000 | -3.998497000 | 0.686409000  |
| 6  | -0.979491000 | -2.009196000 | 0.613290000  |
| 1  | -0.576812000 | -2.872868000 | 1.143254000  |
| 6  | 4.196376000  | 0.364368000  | -0.810112000 |
| 1  | 3.686609000  | 1.095912000  | -1.427675000 |
| 6  | -4.429836000 | -0.825614000 | -0.356497000 |
| 1  | -4.902815000 | 0.068866000  | -0.748347000 |
| 6  | -2.396890000 | -1.964454000 | 0.369635000  |
| 6  | 5.580133000  | 0.330700000  | -0.748494000 |
| 1  | 6.170201000  | 1.040893000  | -1.319166000 |
| 6  | 6.208523000  | -0.631175000 | 0.057625000  |
| 1  | 7.293450000  | -0.666221000 | 0.113082000  |
| 6  | -5.166680000 | -1.966862000 | -0.062597000 |
| 1  | -6.238967000 | -1.966619000 | -0.238567000 |
| 1  | 2.426362000  | -2.301990000 | 1.323833000  |
| 6  | -0.983189000 | 2.586430000  | 1.580219000  |
| 8  | -0.507725000 | 1.899878000  | 0.430203000  |
| 6  | -1.312978000 | 1.555416000  | 2.672244000  |
| 6  | -2.234219000 | 3.391774000  | 1.190568000  |
| 6  | 0.143323000  | 3.523412000  | 2.047186000  |
| 1  | -0.208612000 | 2.985077000  | -1.707418000 |
| 1  | -0.159293000 | 4.081971000  | 2.940422000  |

|   |              |             |             |
|---|--------------|-------------|-------------|
| 1 | -2.624744000 | 3.941047000 | 2.054978000 |
| 1 | -1.648019000 | 2.057935000 | 3.587033000 |
| 1 | -1.993598000 | 4.118603000 | 0.406167000 |
| 1 | -3.015633000 | 2.724447000 | 0.816113000 |
| 1 | -2.105846000 | 0.880248000 | 2.337826000 |

## B2 - With Ligand L<sup>3OMe</sup>

### MoO<sub>2</sub>(L<sup>3OMe</sup>)(MeOH)

|    |              |              |              |
|----|--------------|--------------|--------------|
| 6  | -0.712029000 | -2.215418000 | 2.625165000  |
| 1  | -1.773566000 | -2.147753000 | 2.363348000  |
| 1  | -0.583809000 | -2.153000000 | 3.711227000  |
| 1  | -0.309025000 | -3.157331000 | 2.256458000  |
| 1  | -2.675321000 | 2.514479000  | 0.296625000  |
| 1  | -0.276718000 | -0.314152000 | 2.273529000  |
| 42 | 0.374856000  | -1.215843000 | -0.497159000 |
| 7  | -1.442596000 | 1.272976000  | 0.099449000  |
| 8  | -1.639026000 | -0.983450000 | -0.316383000 |
| 8  | 0.417329000  | -2.890733000 | -0.197124000 |
| 8  | 0.048948000  | -1.179098000 | 1.978960000  |
| 7  | -0.099985000 | 0.970104000  | 0.025728000  |
| 6  | -4.298301000 | 1.547811000  | 0.090804000  |
| 6  | -2.179390000 | 0.199766000  | -0.123658000 |
| 6  | 4.221001000  | 0.469666000  | 0.021076000  |
| 6  | 2.801876000  | 0.544715000  | 0.051446000  |
| 6  | 4.344697000  | 2.898879000  | 0.084963000  |
| 1  | 4.951962000  | 3.798589000  | 0.094997000  |
| 6  | 0.742039000  | 1.953229000  | 0.137602000  |
| 1  | 0.331923000  | 2.957159000  | 0.261201000  |
| 8  | 0.498046000  | -0.991539000 | -2.172431000 |
| 8  | 2.123970000  | -0.602243000 | 0.083956000  |
| 6  | -5.701746000 | 1.590610000  | 0.070540000  |
| 1  | -6.182580000 | 2.547687000  | 0.245405000  |
| 6  | -3.638995000 | 0.307830000  | -0.134988000 |
| 6  | -4.413763000 | -0.845157000 | -0.378166000 |
| 1  | -3.894120000 | -1.780472000 | -0.555796000 |
| 6  | 2.175377000  | 1.812158000  | 0.094934000  |
| 6  | 4.973195000  | 1.642930000  | 0.035392000  |
| 6  | 2.967011000  | 2.985509000  | 0.118720000  |
| 1  | 2.472964000  | 3.952516000  | 0.154622000  |
| 6  | -5.798191000 | -0.788622000 | -0.397097000 |
| 1  | -6.379296000 | -1.685269000 | -0.588537000 |
| 6  | -6.438591000 | 0.439339000  | -0.169697000 |
| 1  | -7.524025000 | 0.495096000  | -0.182741000 |
| 1  | 6.055741000  | 1.593026000  | 0.009887000  |
| 8  | -3.648121000 | 2.701106000  | 0.330129000  |
| 8  | 4.728934000  | -0.787195000 | -0.017688000 |
| 6  | 6.138663000  | -0.940612000 | -0.063985000 |
| 1  | 6.564984000  | -0.473052000 | -0.961378000 |
| 1  | 6.619165000  | -0.518133000 | 0.828622000  |
| 1  | 6.318073000  | -2.016122000 | -0.096702000 |

### MoO<sub>2</sub>(L<sup>3OMe</sup>)

|    |              |              |              |
|----|--------------|--------------|--------------|
| 42 | -0.338408000 | -1.372968000 | 0.142471000  |
| 8  | 1.632208000  | -1.120022000 | -0.151581000 |
| 8  | -0.399309000 | -2.833334000 | -0.718616000 |

|   |              |              |             |
|---|--------------|--------------|-------------|
| 1 | -0.425562000 | 0.959995000  | 2.912564000 |
| 1 | 1.043836000  | 2.947966000  | 2.285714000 |
| 1 | 0.394423000  | 4.243079000  | 1.260144000 |
| 8 | 3.396533000  | -2.435676000 | 1.467466000 |

|   |              |              |              |
|---|--------------|--------------|--------------|
| 7 | 1.468645000  | 1.163477000  | -0.067768000 |
| 6 | 4.336238000  | 1.399623000  | -0.064096000 |
| 7 | 0.130112000  | 0.846200000  | -0.030772000 |
| 6 | 2.202435000  | 0.071452000  | -0.099540000 |
| 8 | -2.064285000 | -0.657671000 | -0.381173000 |
| 6 | 5.739968000  | 1.416972000  | -0.064366000 |
| 1 | 6.235764000  | 2.381743000  | -0.033018000 |
| 6 | -2.761001000 | 0.459554000  | -0.161928000 |
| 8 | -0.458993000 | -1.666171000 | 1.807625000  |
| 6 | 3.658860000  | 0.149304000  | -0.103958000 |
| 6 | -2.931346000 | 2.877071000  | 0.170278000  |
| 1 | -2.441086000 | 3.838066000  | 0.296807000  |
| 6 | -4.308340000 | 2.778722000  | 0.176042000  |
| 1 | -4.920615000 | 3.665391000  | 0.306847000  |
| 6 | -0.708549000 | 1.843537000  | -0.004526000 |
| 1 | -0.282988000 | 2.847343000  | 0.015916000  |
| 6 | 4.415226000  | -1.040945000 | -0.144819000 |
| 1 | 3.882272000  | -1.984933000 | -0.176031000 |
| 6 | -4.178214000 | 0.369871000  | -0.157592000 |
| 6 | -2.138386000 | 1.714974000  | 0.009676000  |
| 6 | 5.799841000  | -1.008664000 | -0.144273000 |
| 1 | 6.367935000  | -1.932964000 | -0.175072000 |
| 6 | 6.458518000  | 0.230405000  | -0.103506000 |
| 1 | 7.544792000  | 0.266249000  | -0.102730000 |
| 6 | -4.932887000 | 1.529422000  | 0.013858000  |
| 1 | -6.015423000 | 1.474474000  | 0.020688000  |
| 8 | 3.703879000  | 2.586505000  | -0.026783000 |
| 1 | 2.729464000  | 2.418805000  | -0.034453000 |
| 8 | -4.677914000 | -0.877093000 | -0.328848000 |
| 6 | -6.088404000 | -1.043198000 | -0.326467000 |
| 1 | -6.526736000 | -0.732159000 | 0.630785000  |
| 1 | -6.560085000 | -0.481327000 | -1.143280000 |
| 1 | -6.259902000 | -2.110106000 | -0.474131000 |

### MoO<sub>2</sub>(L<sup>3OMe</sup>)(TBHP)

|    |              |              |              |
|----|--------------|--------------|--------------|
| 42 | -0.248178000 | 0.102538000  | -1.437587000 |
| 8  | 1.719724000  | 0.141424000  | -1.098404000 |
| 8  | -0.321515000 | 1.655467000  | -2.159091000 |
| 7  | 1.566377000  | -1.354593000 | 0.633061000  |
| 6  | 4.431276000  | -1.424201000 | 0.863888000  |
| 7  | 0.230717000  | -1.225906000 | 0.340845000  |
| 6  | 2.292640000  | -0.616308000 | -0.180508000 |
| 8  | -1.979547000 | 0.011906000  | -0.575979000 |
| 6  | 5.833943000  | -1.388720000 | 0.908705000  |
| 1  | 6.334539000  | -2.017185000 | 1.638127000  |
| 6  | -2.666165000 | -0.931939000 | 0.078544000  |
| 8  | -0.376068000 | -1.066149000 | -2.652473000 |
| 6  | 3.747464000  | -0.612334000 | -0.083517000 |
| 6  | -2.823320000 | -2.828834000 | 1.610627000  |
| 1  | -2.329312000 | -3.565187000 | 2.238067000  |

|   |              |              |              |
|---|--------------|--------------|--------------|
| 6 | -4.200364000 | -2.803397000 | 1.501201000  |
| 1 | -4.806194000 | -3.522781000 | 2.043150000  |
| 6 | -0.604054000 | -1.936097000 | 1.040913000  |
| 1 | -0.182696000 | -2.609483000 | 1.788059000  |
| 6 | 4.496489000  | 0.212442000  | -0.948838000 |
| 1 | 3.958506000  | 0.829862000  | -1.659609000 |
| 6 | -4.081474000 | -0.907878000 | -0.019919000 |
| 6 | -2.035843000 | -1.897900000 | 0.892966000  |
| 6 | 5.880057000  | 0.238659000  | -0.892053000 |
| 1 | 6.442265000  | 0.879502000  | -1.563839000 |
| 6 | 6.545260000  | -0.569635000 | 0.043230000  |
| 1 | 7.630842000  | -0.556202000 | 0.095327000  |
| 6 | -4.831171000 | -1.846194000 | 0.688874000  |
| 1 | -5.912798000 | -1.840482000 | 0.618679000  |
| 1 | 2.830639000  | -2.147809000 | 1.593249000  |
| 6 | -0.618540000 | 2.791615000  | 1.653124000  |
| 8 | 0.250074000  | 2.128669000  | 0.683217000  |
| 8 | 0.859907000  | 3.144557000  | -0.164368000 |
| 6 | -1.062867000 | 1.639956000  | 2.560059000  |
| 6 | -1.807903000 | 3.437566000  | 0.935930000  |
| 6 | 0.200588000  | 3.816855000  | 2.444610000  |
| 1 | 0.431549000  | 2.913564000  | -1.019157000 |
| 1 | -0.420958000 | 4.271739000  | 3.224170000  |
| 1 | -2.475218000 | 3.917521000  | 1.660922000  |
| 1 | -1.686686000 | 2.032988000  | 3.369883000  |
| 1 | -1.461889000 | 4.203071000  | 0.235597000  |
| 1 | -2.379966000 | 2.686588000  | 0.381125000  |
| 1 | -1.649119000 | 0.902320000  | 2.006225000  |
| 1 | -0.194410000 | 1.142606000  | 3.004296000  |
| 1 | 1.059030000  | 3.333246000  | 2.922579000  |
| 1 | 0.571000000  | 4.607058000  | 1.788145000  |
| 8 | 3.805677000  | -2.237145000 | 1.734352000  |
| 8 | -4.587731000 | 0.063414000  | -0.818659000 |
| 6 | -5.997130000 | 0.134484000  | -0.979313000 |
| 1 | -6.397279000 | -0.788532000 | -1.418558000 |
| 1 | -6.500727000 | 0.331552000  | -0.023795000 |
| 1 | -6.174811000 | 0.966959000  | -1.661243000 |

TS

|    |              |              |              |
|----|--------------|--------------|--------------|
| 42 | 0.887463000  | 0.031384000  | 2.585039000  |
| 8  | -0.714635000 | 1.200364000  | 2.184471000  |
| 8  | 0.877144000  | 0.255784000  | 4.303203000  |
| 7  | -0.221477000 | 1.258013000  | -0.064038000 |
| 6  | -2.526693000 | 2.884323000  | -0.558989000 |
| 7  | 0.818373000  | 0.461812000  | 0.345652000  |
| 6  | -0.986960000 | 1.589513000  | 0.957904000  |
| 8  | 2.693511000  | -0.481353000 | 2.091763000  |
| 6  | -3.679233000 | 3.672375000  | -0.712952000 |
| 1  | -3.924259000 | 4.022082000  | -1.710701000 |
| 6  | 3.203607000  | -1.108921000 | 1.026532000  |
| 8  | 0.163798000  | -1.476258000 | 2.324431000  |
| 6  | -2.177515000 | 2.411928000  | 0.736499000  |
| 6  | 3.338692000  | -1.577220000 | -1.367402000 |
| 1  | 2.946625000  | -1.431906000 | -2.370148000 |
| 6  | 4.436477000  | -2.388753000 | -1.151844000 |
| 1  | 4.918843000  | -2.891137000 | -1.984576000 |

|   |              |              |              |
|---|--------------|--------------|--------------|
| 6 | 1.567862000  | -0.077745000 | -0.563240000 |
| 1 | 1.321849000  | 0.117856000  | -1.608104000 |
| 6 | -3.002219000 | 2.745108000  | 1.829629000  |
| 1 | -2.724029000 | 2.370164000  | 2.808466000  |
| 6 | 4.339210000  | -1.935256000 | 1.233891000  |
| 6 | 2.700363000  | -0.931153000 | -0.283416000 |
| 6 | -4.138120000 | 3.521818000  | 1.664358000  |
| 1 | -4.763557000 | 3.766019000  | 2.517545000  |
| 6 | -4.471573000 | 3.985384000  | 0.382432000  |
| 1 | -5.359973000 | 4.595451000  | 0.240439000  |
| 6 | 4.939234000  | -2.569089000 | 0.146785000  |
| 1 | -1.037167000 | 2.054078000  | -1.395765000 |
| 6 | 3.045666000  | 2.920072000  | 2.353132000  |
| 8 | 1.835848000  | 2.221910000  | 2.650607000  |
| 8 | 1.300344000  | 2.847126000  | 4.356786000  |
| 6 | 3.407825000  | 2.617858000  | 0.884390000  |
| 6 | 4.175621000  | 2.459446000  | 3.288208000  |
| 6 | 2.798856000  | 4.433849000  | 2.487677000  |
| 1 | 1.196179000  | 1.868533000  | 4.527760000  |
| 1 | 3.681839000  | 4.997539000  | 2.163976000  |
| 1 | 5.110760000  | 2.987783000  | 3.065295000  |
| 1 | 4.290651000  | 3.201877000  | 0.598315000  |
| 1 | 3.906516000  | 2.662262000  | 4.329575000  |
| 1 | 4.347658000  | 1.384159000  | 3.177923000  |
| 1 | 3.640622000  | 1.561647000  | 0.739795000  |
| 1 | 2.581756000  | 2.894970000  | 0.221913000  |
| 1 | 1.948524000  | 4.733477000  | 1.865829000  |
| 1 | 2.580521000  | 4.700512000  | 3.524667000  |
| 6 | 0.010005000  | 3.452965000  | 5.508037000  |
| 1 | -0.129655000 | 4.449872000  | 5.105220000  |
| 1 | -0.807659000 | 2.757951000  | 5.346125000  |
| 6 | 0.966448000  | 3.207660000  | 6.470726000  |
| 1 | 1.027359000  | 2.245873000  | 6.969954000  |
| 1 | 1.712733000  | 3.952428000  | 6.723060000  |
| 8 | -1.806871000 | 2.620316000  | -1.663428000 |
| 1 | 5.803065000  | -3.206131000 | 0.298398000  |
| 8 | 4.753483000  | -2.029612000 | 2.523718000  |
| 6 | 5.870017000  | -2.856921000 | 2.809367000  |
| 1 | 5.679211000  | -3.900979000 | 2.527957000  |
| 1 | 6.775338000  | -2.503195000 | 2.298030000  |
| 1 | 6.016562000  | -2.794508000 | 3.888652000  |

MoO(OR)(OH)(L<sup>3OMe</sup>)

|    |              |              |              |
|----|--------------|--------------|--------------|
| 42 | -0.226918000 | 0.639872000  | -0.965170000 |
| 8  | 1.767972000  | 0.482625000  | -0.899942000 |
| 8  | -0.152497000 | 2.156746000  | -2.123490000 |
| 7  | 1.665560000  | -1.335596000 | 0.488511000  |
| 6  | 4.535387000  | -1.436329000 | 0.620696000  |
| 7  | 0.321218000  | -1.156331000 | 0.261492000  |
| 6  | 2.367373000  | -0.444004000 | -0.176636000 |
| 8  | -1.975697000 | 0.215754000  | -0.156680000 |
| 6  | 5.939146000  | -1.410410000 | 0.625050000  |
| 1  | 6.458761000  | -2.162417000 | 1.210016000  |
| 6  | -2.596627000 | -0.944327000 | 0.027824000  |
| 8  | -0.635501000 | -0.400804000 | -2.242040000 |
| 6  | 3.827173000  | -0.462946000 | -0.136583000 |

|   |              |              |              |
|---|--------------|--------------|--------------|
| 6 | -2.636107000 | -3.282235000 | 0.750599000  |
| 1 | -2.097780000 | -4.164066000 | 1.086549000  |
| 6 | -4.006604000 | -3.312548000 | 0.587974000  |
| 1 | -4.564179000 | -4.220712000 | 0.794290000  |
| 6 | -0.483144000 | -2.099832000 | 0.652867000  |
| 1 | -0.030610000 | -2.965999000 | 1.136104000  |
| 6 | 4.553179000  | 0.501236000  | -0.865356000 |
| 1 | 3.996384000  | 1.233429000  | -1.440018000 |
| 6 | -4.009053000 | -0.984253000 | -0.118853000 |
| 6 | -1.909574000 | -2.101352000 | 0.463606000  |
| 6 | 5.938718000  | 0.514252000  | -0.853630000 |
| 1 | 6.483232000  | 1.262266000  | -1.421297000 |
| 6 | 6.628243000  | -0.449463000 | -0.101645000 |
| 1 | 7.715052000  | -0.448071000 | -0.085476000 |
| 6 | -4.694711000 | -2.165018000 | 0.153413000  |
| 1 | -5.771163000 | -2.207520000 | 0.032531000  |
| 1 | 2.953223000  | -2.290241000 | 1.241993000  |
| 6 | -0.769992000 | 2.601152000  | 1.607163000  |
| 8 | -0.195841000 | 1.889281000  | 0.516791000  |
| 6 | -1.028747000 | 1.613311000  | 2.756798000  |

|   |              |              |              |
|---|--------------|--------------|--------------|
| 6 | -2.080709000 | 3.257721000  | 1.141192000  |
| 6 | 0.252665000  | 3.667142000  | 2.035218000  |
| 1 | 0.081734000  | 2.951789000  | -1.612343000 |
| 1 | -0.124466000 | 4.250339000  | 2.883239000  |
| 1 | -2.539635000 | 3.821677000  | 1.961727000  |
| 1 | -1.417548000 | 2.139752000  | 3.636260000  |
| 1 | -1.889221000 | 3.954697000  | 0.317012000  |
| 1 | -2.787113000 | 2.498298000  | 0.795185000  |
| 1 | -1.757132000 | 0.855561000  | 2.455801000  |
| 1 | -0.097559000 | 1.110781000  | 3.040067000  |
| 1 | 1.195910000  | 3.195371000  | 2.330061000  |
| 1 | 0.458385000  | 4.356646000  | 1.208747000  |
| 8 | 3.931957000  | -2.394936000 | 1.346644000  |
| 8 | -4.576150000 | 0.183205000  | -0.522487000 |
| 6 | -5.981206000 | 0.209604000  | -0.719953000 |
| 1 | -6.291123000 | -0.505809000 | -1.492933000 |
| 1 | -6.523036000 | -0.004686000 | 0.211055000  |
| 1 | -6.215420000 | 1.222605000  | -1.050289000 |

### B3 - With Ligand L<sup>4OMe</sup>

#### MoO<sub>2</sub>(L<sup>4OMe</sup>)(MeOH)

|    |              |              |              |
|----|--------------|--------------|--------------|
| 6  | -0.947235000 | -2.227545000 | 2.654052000  |
| 1  | -2.003728000 | -2.108570000 | 2.389994000  |
| 1  | -0.815419000 | -2.144259000 | 3.738385000  |
| 1  | -0.597951000 | -3.199789000 | 2.310105000  |
| 1  | -2.560296000 | 2.604083000  | 0.277549000  |
| 1  | -0.418855000 | -0.362936000 | 2.242957000  |
| 42 | 0.168715000  | -1.360898000 | -0.505153000 |
| 7  | -1.431032000 | 1.263853000  | 0.079698000  |
| 8  | -1.811517000 | -0.969773000 | -0.320562000 |
| 8  | 0.083080000  | -3.027838000 | -0.166041000 |
| 8  | -0.131185000 | -1.251780000 | 1.981588000  |
| 7  | -0.116521000 | 0.846639000  | 0.002886000  |
| 6  | -4.257909000 | 1.769729000  | 0.089970000  |
| 6  | -2.255080000 | 0.257403000  | -0.131421000 |
| 6  | 4.144254000  | -0.005468000 | 0.016812000  |
| 1  | 4.508909000  | -1.024233000 | -0.011035000 |
| 6  | 2.755053000  | 0.184647000  | 0.033996000  |
| 6  | 4.481321000  | 2.408327000  | 0.091557000  |
| 1  | 5.172215000  | 3.243690000  | 0.110714000  |
| 6  | 0.806793000  | 1.759392000  | 0.111035000  |
| 1  | 0.477735000  | 2.793709000  | 0.227927000  |
| 8  | 0.311677000  | -1.186054000 | -2.184593000 |
| 8  | 1.985374000  | -0.904431000 | 0.052013000  |
| 6  | -5.653311000 | 1.924538000  | 0.081505000  |
| 1  | -6.054704000 | 2.917924000  | 0.254368000  |
| 6  | -3.701679000 | 0.480161000  | -0.133533000 |
| 6  | -4.567619000 | -0.608603000 | -0.362618000 |
| 1  | -4.125945000 | -1.583584000 | -0.538020000 |
| 6  | 2.214472000  | 1.499932000  | 0.077577000  |
| 6  | 5.002495000  | 1.095767000  | 0.040026000  |
| 6  | 3.116936000  | 2.591260000  | 0.113143000  |
| 1  | 2.710866000  | 3.599090000  | 0.150726000  |
| 6  | -5.943552000 | -0.441861000 | -0.370001000 |
| 1  | -6.595896000 | -1.290515000 | -0.550552000 |
| 6  | -6.482014000 | 0.834209000  | -0.144889000 |
| 1  | -7.559625000 | 0.976279000  | -0.148787000 |
| 8  | -3.514354000 | 2.868475000  | 0.316688000  |
| 8  | 6.352344000  | 1.009149000  | 0.021077000  |
| 6  | 6.956374000  | -0.278947000 | -0.041432000 |
| 1  | 6.698596000  | -0.882537000 | 0.837375000  |
| 1  | 6.659445000  | -0.813568000 | -0.951742000 |
| 1  | 8.032326000  | -0.100121000 | -0.057647000 |

#### MoO<sub>2</sub>(L<sup>4OMe</sup>)

|    |              |              |              |
|----|--------------|--------------|--------------|
| 42 | -0.115923000 | -1.531022000 | 0.086230000  |
| 8  | 1.828993000  | -1.121135000 | -0.156796000 |
| 8  | -0.069272000 | -2.927175000 | -0.877930000 |
| 7  | 1.475662000  | 1.136410000  | -0.051244000 |
| 6  | 4.315018000  | 1.613960000  | -0.022369000 |
| 7  | 0.164990000  | 0.703380000  | -0.032946000 |
| 6  | 2.299344000  | 0.115014000  | -0.088688000 |
| 8  | -1.925766000 | -0.959612000 | -0.373371000 |
| 6  | 5.712023000  | 1.749216000  | -0.011165000 |
| 1  | 6.124674000  | 2.751845000  | 0.034536000  |

|   |              |              |              |
|---|--------------|--------------|--------------|
| 6 | -2.705963000 | 0.104181000  | -0.172721000 |
| 8 | -0.214691000 | -1.947800000 | 1.726622000  |
| 6 | 3.745075000  | 0.312329000  | -0.081099000 |
| 6 | -3.053401000 | 2.492544000  | 0.147541000  |
| 1 | -2.642381000 | 3.490649000  | 0.275486000  |
| 6 | -4.416980000 | 2.311243000  | 0.137474000  |
| 1 | -5.106086000 | 3.139985000  | 0.254859000  |
| 6 | -0.752534000 | 1.634825000  | 0.005147000  |
| 1 | -0.400004000 | 2.665919000  | 0.048204000  |
| 6 | 4.598287000  | -0.809608000 | -0.129311000 |
| 1 | 4.146986000  | -1.794730000 | -0.175233000 |
| 6 | -4.093139000 | -0.086784000 | -0.188589000 |
| 1 | -4.462433000 | -1.094110000 | -0.331553000 |
| 6 | -2.158766000 | 1.402407000  | 0.002552000  |
| 6 | 5.975710000  | -0.661406000 | -0.117576000 |
| 1 | 6.619314000  | -1.534637000 | -0.154189000 |
| 6 | 6.528101000  | 0.627449000  | -0.057727000 |
| 1 | 7.607528000  | 0.754075000  | -0.048000000 |
| 6 | -4.945202000 | 1.009127000  | -0.030179000 |
| 8 | 3.583915000  | 2.743147000  | 0.022725000  |
| 1 | 2.627487000  | 2.493808000  | 0.005512000  |
| 8 | -6.293046000 | 0.929035000  | -0.027413000 |
| 6 | -6.907786000 | -0.346822000 | -0.188216000 |
| 1 | -6.646694000 | -0.793606000 | -1.154951000 |
| 1 | -6.621854000 | -1.029291000 | 0.620936000  |
| 1 | -7.982106000 | -0.163232000 | -0.149046000 |

#### MoO<sub>2</sub>(L<sup>4OMe</sup>)(TBHP)

|    |              |              |              |
|----|--------------|--------------|--------------|
| 42 | -0.102878000 | 0.140188000  | -1.531619000 |
| 8  | 1.842398000  | 0.024478000  | -1.122729000 |
| 8  | -0.026600000 | 1.680981000  | -2.280615000 |
| 7  | 1.493900000  | -1.355430000 | 0.672020000  |
| 6  | 4.332190000  | -1.641356000 | 1.044503000  |
| 7  | 0.185459000  | -1.129380000 | 0.309649000  |
| 6  | 2.313864000  | -0.728085000 | -0.140361000 |
| 8  | -1.890684000 | 0.229969000  | -0.761506000 |
| 6  | 5.729461000  | -1.720076000 | 1.151310000  |
| 1  | 6.144240000  | -2.339428000 | 1.940006000  |
| 6  | -2.679176000 | -0.620142000 | -0.091544000 |
| 8  | -0.290193000 | -1.039922000 | -2.727849000 |
| 6  | 3.759339000  | -0.838340000 | 0.019785000  |
| 6  | -3.049164000 | -2.404487000 | 1.518474000  |
| 1  | -2.648528000 | -3.145042000 | 2.205902000  |
| 6  | -4.411853000 | -2.286177000 | 1.361051000  |
| 1  | -5.107613000 | -2.914737000 | 1.905437000  |
| 6  | -0.735895000 | -1.738258000 | 1.003646000  |
| 1  | -0.397749000 | -2.409671000 | 1.793786000  |
| 6  | 4.610285000  | -0.137676000 | -0.859825000 |
| 1  | 4.156426000  | 0.474864000  | -1.630958000 |
| 6  | -4.063965000 | -0.489077000 | -0.251354000 |
| 1  | -4.423188000 | 0.268910000  | -0.935395000 |
| 6  | -2.143272000 | -1.589805000 | 0.795751000  |
| 6  | 5.988006000  | -0.224406000 | -0.742782000 |
| 1  | 6.629673000  | 0.321385000  | -1.427242000 |
| 6  | 6.543180000  | -1.022042000 | 0.269789000  |

|   |              |              |              |
|---|--------------|--------------|--------------|
| 1 | 7.622921000  | -1.096311000 | 0.370018000  |
| 6 | -4.927588000 | -1.321512000 | 0.465667000  |
| 1 | 2.646692000  | -2.184696000 | 1.740261000  |
| 6 | -0.303661000 | 2.960723000  | 1.509073000  |
| 8 | 0.508602000  | 2.197512000  | 0.567295000  |
| 8 | 1.222716000  | 3.131877000  | -0.292747000 |
| 6 | -0.886185000 | 1.874020000  | 2.418058000  |
| 6 | -1.403888000 | 3.717552000  | 0.758943000  |
| 6 | 0.601681000  | 3.906018000  | 2.306301000  |
| 1 | 0.799818000  | 2.906180000  | -1.151587000 |
| 1 | 0.017139000  | 4.432348000  | 3.069482000  |
| 1 | -2.037435000 | 4.268503000  | 1.463316000  |
| 1 | -1.484185000 | 2.339463000  | 3.208925000  |
| 1 | -0.965730000 | 4.435549000  | 0.060388000  |
| 1 | -2.034344000 | 3.020409000  | 0.196717000  |
| 1 | -1.532995000 | 1.193174000  | 1.858085000  |
| 1 | -0.084310000 | 1.294980000  | 2.887727000  |
| 1 | 1.396867000  | 3.341898000  | 2.804839000  |
| 1 | 1.063094000  | 4.646258000  | 1.649010000  |
| 8 | 3.603752000  | -2.341966000 | 1.933390000  |
| 8 | -6.275146000 | -1.277543000 | 0.375488000  |
| 6 | -6.875176000 | -0.340773000 | -0.514868000 |
| 1 | -6.630603000 | 0.690022000  | -0.231293000 |
| 1 | -6.561756000 | -0.520579000 | -1.550172000 |
| 1 | -7.950914000 | -0.497378000 | -0.426427000 |

TS

|    |              |              |              |
|----|--------------|--------------|--------------|
| 42 | 0.363401000  | 0.571591000  | 1.217078000  |
| 8  | -1.586777000 | 0.383229000  | 0.738819000  |
| 8  | 0.204494000  | 2.059206000  | 2.092340000  |
| 7  | -1.121151000 | -1.169078000 | -0.893965000 |
| 6  | -3.905703000 | -1.364086000 | -1.547141000 |
| 7  | 0.160593000  | -0.956417000 | -0.444313000 |
| 6  | -1.979768000 | -0.440086000 | -0.213144000 |
| 8  | 2.228645000  | 0.474331000  | 0.645897000  |
| 6  | -5.288304000 | -1.409549000 | -1.789779000 |
| 1  | -5.641198000 | -2.049383000 | -2.592251000 |
| 6  | 2.999617000  | -0.543825000 | 0.242142000  |
| 8  | 0.456481000  | -0.640233000 | 2.394643000  |
| 6  | -3.411358000 | -0.532641000 | -0.504724000 |
| 6  | 3.394614000  | -2.608187000 | -0.978624000 |
| 1  | 3.012522000  | -3.430657000 | -1.578139000 |
| 6  | 4.735868000  | -2.561744000 | -0.664856000 |
| 1  | 5.428688000  | -3.326103000 | -0.998639000 |
| 6  | 1.101534000  | -1.725636000 | -0.902624000 |
| 1  | 0.815736000  | -2.509235000 | -1.606336000 |
| 6  | -4.325495000 | 0.216869000  | 0.261767000  |
| 1  | -3.930994000 | 0.838082000  | 1.058483000  |
| 6  | 4.364025000  | -0.487603000 | 0.557557000  |
| 1  | 4.708208000  | 0.354259000  | 1.144669000  |
| 6  | 2.485788000  | -1.619451000 | -0.532737000 |
| 6  | -5.688665000 | 0.159772000  | 0.015969000  |
| 1  | -6.378873000 | 0.740915000  | 0.619862000  |
| 6  | -6.165209000 | -0.659093000 | -1.018967000 |
| 1  | -7.231812000 | -0.711404000 | -1.221965000 |
| 6  | 5.227188000  | -1.492746000 | 0.114960000  |

|   |              |              |              |
|---|--------------|--------------|--------------|
| 1 | -2.178099000 | -1.990230000 | -2.030267000 |
| 6 | 0.876896000  | 2.596007000  | -1.752278000 |
| 8 | 0.145486000  | 2.060768000  | -0.650150000 |
| 8 | -0.745910000 | 3.538362000  | 0.131326000  |
| 6 | 1.455642000  | 1.407754000  | -2.548106000 |
| 6 | 2.010895000  | 3.505790000  | -1.252989000 |
| 6 | -0.088408000 | 3.368559000  | -2.669631000 |
| 1 | -0.351188000 | 3.160150000  | 0.966645000  |
| 1 | 0.427638000  | 3.704423000  | -3.576888000 |
| 1 | 2.587661000  | 3.914504000  | -2.091599000 |
| 1 | 1.969734000  | 1.782722000  | -3.441056000 |
| 1 | 1.597590000  | 4.341291000  | -0.679551000 |
| 1 | 2.690493000  | 2.943093000  | -0.604801000 |
| 1 | 2.176438000  | 0.842765000  | -1.954551000 |
| 1 | 0.653957000  | 0.735415000  | -2.869043000 |
| 1 | -0.923646000 | 2.724148000  | -2.963831000 |
| 1 | -0.491332000 | 4.245459000  | -2.156878000 |
| 6 | -2.247044000 | 4.281540000  | 0.854168000  |
| 1 | -2.834908000 | 4.401158000  | -0.049081000 |
| 1 | -2.590095000 | 3.515533000  | 1.542154000  |
| 6 | -1.388918000 | 5.276894000  | 1.274217000  |
| 1 | -0.897664000 | 5.224419000  | 2.240619000  |
| 1 | -1.142429000 | 6.113626000  | 0.630437000  |
| 8 | -3.114879000 | -2.119437000 | -2.330026000 |
| 8 | 6.555165000  | -1.526805000 | 0.378441000  |
| 6 | 7.122461000  | -0.489617000 | 1.170726000  |
| 1 | 8.183345000  | -0.729124000 | 1.256331000  |
| 1 | 7.006350000  | 0.489134000  | 0.689059000  |
| 1 | 6.671520000  | -0.460092000 | 2.170154000  |

MoO(OR)(OH)(L<sup>4OMe</sup>)

|    |              |              |              |
|----|--------------|--------------|--------------|
| 42 | -0.075436000 | 0.748277000  | -1.023679000 |
| 8  | 1.886267000  | 0.384524000  | -0.943209000 |
| 8  | 0.164862000  | 2.233829000  | -2.201642000 |
| 7  | 1.584491000  | -1.357118000 | 0.509545000  |
| 6  | 4.428524000  | -1.752160000 | 0.681300000  |
| 7  | 0.267331000  | -1.042988000 | 0.259090000  |
| 6  | 2.382097000  | -0.572271000 | -0.176925000 |
| 8  | -1.890910000 | 0.538573000  | -0.249325000 |
| 6  | 5.827037000  | -1.871445000 | 0.703436000  |
| 1  | 6.260116000  | -2.651553000 | 1.321205000  |
| 6  | -2.629004000 | -0.545472000 | -0.027771000 |
| 8  | -0.578273000 | -0.267768000 | -2.286988000 |
| 6  | 3.832160000  | -0.739136000 | -0.118556000 |
| 6  | -2.906688000 | -2.818449000 | 0.804965000  |
| 1  | -2.468988000 | -3.733268000 | 1.196524000  |
| 6  | -4.269333000 | -2.737016000 | 0.628828000  |
| 1  | -4.929323000 | -3.562917000 | 0.869151000  |
| 6  | -0.637375000 | -1.884566000 | 0.674636000  |
| 1  | -0.278574000 | -2.775376000 | 1.191031000  |
| 6  | 4.660924000  | 0.118234000  | -0.870065000 |
| 1  | 4.188861000  | 0.882830000  | -1.477508000 |
| 6  | -4.018062000 | -0.456187000 | -0.201780000 |
| 1  | -4.419155000 | 0.473943000  | -0.583320000 |
| 6  | -2.045861000 | -1.743364000 | 0.472977000  |
| 6  | 6.040572000  | -0.011178000 | -0.840188000 |



|   |              |              |              |
|---|--------------|--------------|--------------|
| 1 | 6.664895000  | 0.656125000  | -1.426077000 |
| 6 | 6.619386000  | -1.013233000 | -0.046661000 |
| 1 | 7.700289000  | -1.123394000 | -0.015903000 |
| 6 | -4.831400000 | -1.546053000 | 0.113999000  |
| 1 | 2.759914000  | -2.414503000 | 1.311319000  |
| 6 | -0.367426000 | 2.769966000  | 1.554937000  |
| 8 | 0.083273000  | 2.003030000  | 0.446485000  |
| 6 | -0.752409000 | 1.811660000  | 2.694192000  |
| 6 | -1.574175000 | 3.617503000  | 1.117902000  |
| 6 | 0.801843000  | 3.672550000  | 1.983759000  |
| 1 | 0.486575000  | 3.005459000  | -1.702352000 |
| 1 | 0.521619000  | 4.291245000  | 2.844163000  |
| 1 | -1.938721000 | 4.228655000  | 1.951640000  |

|   |              |              |              |
|---|--------------|--------------|--------------|
| 1 | -1.065790000 | 2.373896000  | 3.581604000  |
| 1 | -1.294261000 | 4.291237000  | 0.299805000  |
| 1 | -2.387264000 | 2.973118000  | 0.772305000  |
| 1 | -1.575337000 | 1.159950000  | 2.387572000  |
| 1 | 0.103832000  | 1.185597000  | 2.967317000  |
| 1 | 1.670584000  | 3.065983000  | 2.259868000  |
| 1 | 1.094274000  | 4.337285000  | 1.163295000  |
| 8 | 3.721229000  | -2.616222000 | 1.432618000  |
| 8 | -6.176097000 | -1.560258000 | -0.034519000 |
| 6 | -6.820465000 | -0.407424000 | -0.566208000 |
| 1 | -6.673292000 | 0.465755000  | 0.081265000  |
| 1 | -6.457491000 | -0.179466000 | -1.575643000 |
| 1 | -7.882096000 | -0.654899000 | -0.607190000 |
